# Supplementary material for: CAR Immunotherapy for the treatment of infectious diseases: a systematic review
Source: Front Immunol. 2024 Jan 30;15:1289303. doi: 10.3389/fimmu.2024.1289303 (PMC10861799; doi:10.3389/fimmu.2024.1289303)
Supplement: Supplementary file 1 [file DataSheet_1.xlsx]

## Sheet: Sheet1
DOI	PMID:	Titles	Year	Source title	Author full names (first autor)	Infection	Pathogen	Cell	Method	Target	Receptor	Clinical Trial	Patients #
10.1182/blood.V84.9.2878.2878	7949163	Targeting of human immunodeficiency virus-infected cells by CD8+ T lymphocytes armed with universal T-cell receptors	1994	Blood	Roberts, M.R.	Viral	HIV	T cells	retroviral transduction	gp120, gp41	scFv	No	-
10.1073/pnas.94.21.11478	9326635	Lysis of HIV-1-infected cells and inhibition of viral replication by universal receptor T cells	1997	Proc Natl Acad Sci	Yang, Otto O.	Viral	HIV	T cells	retroviral transduction	gp120	scFv	No
10.1182/blood.V96.2.467	10887107	Long-term in vivo survival of receptor-modified syngeneic T cells in patients with human immunodeficiency virus infection	2000	Blood	Walker, Robert E.	Viral	HIV	T cells	retroviral transduction	gp120	CD4	Clinical Trial	30
https://doi.org/10.1182/blood.V96.3.785	10910888	Prolonged survival and tissue trafficking following adoptive transfer of CD4zeta gene-modified autologous CD4(+) and CD8(+) T cells in human immunodeficiency virus-infected subjects	2000	Blood	Mitsuyasu, R. T.	Viral	HIV	T cells	retroviral transduction	gp120	CD4	Clinical Trial	24
10.1006/mthe.2002.0611	12027564	A phase II randomized study of HIV-specific T-cell gene therapy in subjects with undetectable plasma viremia on combination antiretroviral therapy	2002	Mol Ther	Deeks, Steven G.	Viral	HIV	T cells	retroviral transduction	gp120	CD4	Clinical Trial	40
10.1038/sj.gt.3302413	15496956	T-cell engineering by a chimeric T-cell receptor with antibody-type specificity for the HIV-1 gp120	2005	Gene Ther	Masiero, S.	Viral	HIV	T cells	retroviral and lentiviral transduction	gp120	scFv	No	-
10.1053/j.gastro.2007.11.002	18166356	T cells redirected against hepatitis B virus surface proteins eliminate infected hepatocytes	2008	Gastroenterology	Bohne, Felix	Viral	HBV	T cells	retroviral transduction	S or L protein	scFv	No	-
10.1128/JVI.02117-09	20147393	T cells engineered with a cytomegalovirus-specific chimeric immunoreceptor	2010	J Virol	Full, Florian	Viral	HCMV	T cells	lentiviral transduction and electroporation	glycoprotein B	scFv	No	-
10.1128/JVI.05039-11	21813600	Engineering T cells specific for a dominant severe acute respiratory syndrome coronavirus CD8 T cell epitope	2011	J Virol	Oh, Hsueh-Ling Janice	Viral	SARS-CoV-1	T cells	retroviral transduction	SARS NP	TCR	No	-
10.1126/scitranslmed.3003761	22553251	Decade-long safety and function of retroviral-modified chimeric antigen receptor T cells	2012	Sci Transl Med	Scholler, John	Viral	HIV	T cells	Gammaretroviral transduction	gp120	CD4	Clinical Trial NCT01013415	-
https://doi.org/10.1053/j.gastro.2013.04.047	23639914	T Cells Expressing a Chimeric Antigen Receptor That Binds Hepatitis B Virus Envelope Proteins Control Virus Replication in Mice	2013	Gastroenterology	Krebs, Karin	Viral	HBV	T cells	retroviral transduction	HBsAg	scFv	No	-
10.1016/j.virol.2013.08.002	24074590	Anti-HIV designer T cells progressively eradicate a latently infected cell line by sequentially inducing HIV reactivation then killing the newly gp120-positive cells	2013	Virology	Sahu, Gautam K.	Viral	HIV	T cells	retroviral transduction	gp120	CD4	No	-
10.1073/pnas.1312789111	25002471	Bioengineering T cells to target carbohydrate to treat opportunistic fungal infection	2014	Proc Natl Acad Sci	Kumaresan, Pappanaicken R.	Fungal	Aspergillus spp	T cells	Sleeping Beauty gene-transfer system electroporation	laminarin (which is rich in β-1,3-glucan)	Dectin-1	No	-
10.7555/JBR.28.20140066	25469116	T cells expressing a LMP1-specific chimeric antigen receptor mediate antitumor effects against LMP1-positive nasopharyngeal carcinoma cells in vitro and in vivo	2014	J Biomed Res	Tang X	Viral	EBV	T cells	lentiviral transduction	LMP1	scFv	No	-
10.1038/mt.2015.102	26050990	HIV-specific Immunity Derived from Chimeric Antigen Receptor-engineered Stem Cells,	2015	Molecular Therapy	Zhen, Anjie	Viral	HIV	HSPCs	lentiviral transduction	gp120	CD4	No	-
10.1016/j.bbrc.2015.05.026	25998390	Ectopic expression of anti-HIV-1 shRNAs protects CD8(+) T cells modified with CD4ζ CAR from HIV-1 infection and alleviates impairment of cell proliferation	2015	Biochem Biophys Res Commun	Kamata, Masakazu	Viral	HIV	T cells		gp120	CD4	No	-
10.1128/JVI.00474-15	25878112	Novel CD4-Based Bispecific Chimeric Antigen Receptor Designed for Enhanced Anti-HIV Potency and Absence of HIV Entry Receptor Activity	2015	J Virol	Liu, Li	Viral	HIV	T cells	Gammaretroviral transduction	gp120	CD4	No	-
10.1136/gutjnl-2014-308316	25661083	Chimeric antigen receptor (CAR)-engineered T cells redirected against hepatitis C virus (HCV) E2 glycoprotein	2016	Gut	Sautto, Giuseppe A.	Viral	HCV	T cells	retroviral transduction	E2 glycoprotein	scFv	No	-
10.1128/JVI.00805-16	27226366	HIV-1-Specific Chimeric Antigen Receptors Based on Broadly Neutralizing Antibodies	2016	J Virol	Ali, Ayub	Viral	HIV	T cells	lentiviral transduction	gp120, gp41	scFv	No	-
10.1128/JVI.00852-16	27535056	Chimeric Antigen Receptor T Cells Guided by the Single-Chain Fv of a Broadly Neutralizing Antibody Specifically and Effectively Eradicate Virus Reactivated from Latency in CD4+ T Lymphocytes Isolated from HIV-1-Infected Individuals Receiving Suppressive Combined Antiretroviral Therapy	2016	J Virol	Liu, Bingfeng	Viral	HIV	T cells	lentiviral transduction	gp120, gp41	scFv	No	-
10.3389/fmicb.2016.00844	27375569	Cytomegalovirus-Infected Cells Resist T Cell Mediated Killing in an HLA-Recognition Independent Manner	2016	Front Microbiol	Proff, Julia	Viral	HCMV	T cells	lentiviral transduction and electroporation	glycoprotein B	scFv	No	-
10.1371/journal.ppat.1006613	29023549	Supraphysiologic control over HIV-1 replication mediated by CD8 T cells expressing a re-engineered CD4-based chimeric antigen receptor,	2017	PLoS Pathogens	Leibman, Rachel S.	Viral	HIV	T cells	lentiviral transduction	gp120	CD4	No	-
10.1371/journal.ppat.1006753	29284044	Long-term persistence and function of hematopoietic stem cell-derived chimeric antigen receptor T cells in a nonhuman primate model of HIV/AIDS,	2017	PLoS pathogens	Zhen, Anjie	Viral	HIV	HSPCs	lentiviral transduction	gp120	CD4	No	-
10.1172/JCI93024	28737510	Lymphocytes transiently expressing virus-specific T cell receptors reduce hepatitis B virus infection	2017	J Clin Invest	Kah, Janine	Viral	HBV	T cells	electroporation	core- or S-derived peptide	TCR	No	-
10.1016/j.jcyt.2017.11.001	29306566	Bispecific chimeric antigen receptors targeting the CD4 binding site and high-mannose Glycans of gp120 optimized for anti–human immunodeficiency virus potency and breadth with minimal immunogenicity,	2018	Cytotherapy	Ghanem, Mustafa H.	Viral	HIV	HSPCs	retroviral transduction	gp120	CD4/C-type lectin	No	-
10.1186/s12967-018-1394-x	29422056	Turning the tables on cytomegalovirus: targeting viral Fc receptors by CARs containing mutated CH2–CH3 IgG spacer domains	2018	J Transl Med	Proff, Julia	Viral	HCMV	T cells	electroporation	glycoprotein B	scFv	No	-
10.3389/fimmu.2018.00492	29616024	Simian Immunodeficiency Virus (SIV)-Specific Chimeric Antigen Receptor-T Cells Engineered to Target B Cell Follicles and Suppress SIV Replication	2018	Front Immunol	Preethi Haran, Kumudhini	Viral	SIV	T cells	Gammaretroviral transduction	gp120	CD4–MBL	No	-
10.1016/j.jcyt.2018.02.002	29631939	HBsAg-redirected T cells exhibit antiviral activity in HBV-infected human liver chimeric mice	2018	Cytotherapy	Kruse, Robert L.	Viral	HBV	T cells	retroviral transduction	HBsAg	scFv	No	-
10.1016/j.cell.2019.10.002	31668804	Attacking Latent HIV with convertibleCAR-T Cells, a Highly Adaptable Killing Platform,	2019	Cell	Herzig, Eytan	Viral	HIV	T cells	retroviral transduction	Ab	NKG2D	No	-
10.1126/scitranslmed.aav5685	31391322	Multispecific anti-HIV duoCAR-T cells display broad in vitro antiviral activity and potent in vivo elimination of HIV-infected cells in a humanized mouse model,	2019	Science Translational Medicine	Anthony-Gonda, Kim	Viral	HIV	T cells	lentiviral transduction	gp120/gp41	CD4/VH/peptide	No	-
10.1016/j.ymthe.2019.02.001	30852138	Evaluation of a Fully Human, Hepatitis B Virus-Specific Chimeric Antigen Receptor in an Immunocompetent Mouse Model	2019	Mol Ther	Festag, Marvin M.	Viral	HBV	T cells	retroviral transduction	HBsAg	scFv	No	-
10.1172/JCI120228	31039136	T cell receptor grafting allows virological control of Hepatitis B virus infection	2019	J Clin Invest	Wisskirchen, Karin	Viral	HBV	T cells	retroviral transduction	core- or S-derived peptide	TCR	No	-
10.2147/OTT.S221040	31807014	CD137 Co-Stimulation Improves The Antitumor Effect Of LMP1-Specific Chimeric Antigen Receptor T Cells In Vitro And In Vivo	2019	Onco Targets Ther	Tang X	Viral	EBV	T cells	lentiviral transduction	LMP1	scFv	No	-
10.1016/j.ymthe.2020.05.012	32454027	HIV-Resistant and HIV-Specific CAR-Modified CD4+ T Cells Mitigate HIV Disease Progression and Confer CD4+ T Cell Help In Vivo,	2020	Molecular Therapy	Maldini, Colby R.	Viral	HIV	T cells	lentiviral transduction	gp120	CD4	No	-
10.1021/acschembio.0c00537	32667183	A Universal CAR-NK Cell Targeting Various Epitopes of HIV-1 gp160,	2020	ACS Chemical Biology	Lim, Rebecca M.	Viral	HIV	NK cells	lentiviral transduction	Ab	scFv	No	-
10.3389/fcimb.2020.00242	32523897	A Trispecific Anti-HIV Chimeric Antigen Receptor Containing the CCR5 N-Terminal Region,	2020	Frontiers in Cellular and Infection Microbiology	Hajduczki, Agnes	Viral	HIV	T cells	retroviral transduction	gp120	CD4/C-type lectin/CCR5	No	-
10.1016/j.omtm.2020.09.014	33102620	Conditionally Replicating Vectors Mobilize Chimeric Antigen Receptors against HIV,	2020	Molecular Therapy - Methods and Clinical Development	Urak, Ryan Z.	Viral	HIV	T cells	lentiviral transduction	gp120	CD4/mannose binding lectin (MBL)/CCR5	No	-
10.1007/s00430-020-00692-0	32918599	Designed Ankyrin Repeat Protein (DARPin) to target chimeric antigen receptor (CAR)-redirected T cells towards CD4+ T cells to reduce the latent HIV+ cell reservoir,	2020	Medical Microbiology and Immunology	Patasic, Lea	Viral	HIV	T cells	Gammaretroviral transduction	CD4	DARPin_57.2	No	-
10.1128/JVI.00190-20	32161179	HIV-1-Specific Chimeric Antigen Receptor T Cells Fail To Recognize and Eliminate the Follicular Dendritic Cell HIV Reservoir In Vitro	2020	J Virol	Ollerton, Matthew T.	Viral	HIV	T cells	retroviral transduction	gp120	CD4/mannose binding lectin (MBL)	No	-
10.1182/blood.2020006372	32614969	Robust expansion of HIV CAR T cells following antigen boosting in ART-suppressed nonhuman primates	2020	blood	Rust, Blake J.	Viral	HIV	T cells	retroviral transduction	gp120	CD4	No	-
10.1038/s41591-020-1039-5	32868878	Dual CD4-based CAR T cells with distinct costimulatory domains mitigate HIV pathogenesis in vivo	2020	Nat Med	Maldini, Colby R.	Viral	HIV	T cells	lentiviral transduction	gp120	CD4	No	-
10.1136/jitc-2020-000736	33127653	CAR-T cells and TRUCKs that recognize an EBNA-3C-derived epitope presented on HLA-B*35 control Epstein-Barr virus-associated lymphoproliferation	2020	J Immunother Cancer	Dragon, Anna Christina	Viral	EBV	T cells	lentiviral transduction	EBNA-3C-derived epitope presented on HLA-B*35	scFv	No	-
10.1016/j.omto.2020.08.005	32953984	CAR-T Cells Targeting Epstein-Barr Virus gp350 Validated in a Humanized Mouse Model of EBV Infection and Lymphoproliferative Disease	2020	Mol Ther Oncolytics	Slabik C	Viral	EBV	T cells	retroviral transduction	gp350	scFv	No	-
10.1089/hum.2019.149	32159399	Adult and Cord Blood-Derived High-Affinity gB-CAR-T Cells Effectively React Against Human Cytomegalovirus Infections	2020	Hum Gene Ther	Olbrich, Henning	Viral	HCMV	T cells	retroviral transduction	glycoprotein B	scFv	No	-
10.3389/fmicb.2021.684016	34295319	HIV-1-Specific CAR-T Cells With Cell-Intrinsic PD-1 Checkpoint Blockade Enhance Anti-HIV Efficacy in vivo,	2021	Frontiers in Microbiology	Jiang, Zhengtao	Viral	HIV	T cells	lentiviral transduction	gp120	scFv	No	-
10.1016/j.omtm.2021.06.008	34485613	Immune inactivation of anti-simian immunodeficiency virus chimeric antigen receptor T cells in rhesus macaques,	2021	Molecular Therapy - Methods and Clinical Development	Haeseleer, Françoise	Viral	SIV	T cells	lentiviral transduction	Env	scFv	No	-
10.1172/jci.insight.141502	33427210	Stem cell–derived CAR T cells traffic to HIV reservoirs in macaques,	2021	JCI Insight	Barber-Axthelm, Isaac M.	Viral	SIV	HSPCs	lentiviral transduction	Env	scFv	No	-
10.1172/JCI150211	34375315	Broadly neutralizing antibody-derived CAR T cells reduce viral reservoir in individuals infected with HIV-1,	2021	Journal of Clinical Investigation	Liu, Bingfeng	Viral	HIV	T cells	lentiviral transduction	gp120	scFv	Clinical Trial NCT03240328	14
10.1136/jitc-2021-002516	34210819	Induction of EBV latent membrane protein-2A (LMP2A)-specific T cells and construction of individualized TCR-engineered T cells for EBV-associated malignancies,	2021	Journal for ImmunoTherapy of Cancer	Zhang, Chaoting	Viral	EBV	T cells	lentiviral transduction	LMP2A	TCR	No	-
10.1016/j.jcyt.2020.11.002	33303326	Glucuronoxylomannan in the Cryptococcus species capsule as a target for Chimeric Antigen Receptor T-cell therapy	2021	Cytotherapy	da Silva, Thiago Aparecido	Fungal	Cryptococcus	T cells	lentiviral transduction	glucuronoxylomannan	scFv	No	-
10.1371/journal.pone.0248973	33752225	Evaluation of chimeric antigen receptor T cell therapy in non-human primates infected with SHIV or SIV	2021	PLoS One	Iwamoto, Nami	Viral	HIV, SIV	T cells	Gammaretroviral transduction	gp120	scFv	No	-
10.1371/journal.ppat.1009404	33793675	Robust CAR-T memory formation and function via hematopoietic stem cell delivery	2021	PLoS Pathog	Zhen, Anjie	Viral	HIV	HSPCs	lentiviral transduction	gp120	CD4	No	-
10.3389/fimmu.2021.734246	34691041	Depletion of T cells via Inducible Caspase 9 Increases Safety of Adoptive T-Cell Therapy Against Chronic Hepatitis B	2021	Front Immunol	Klopp, Alexandre	Viral	HBV	T cells	retroviral transduction	HBsAg or core- and S-peptides presented on HLA-A2	scFv, TCR	No	-
10.3389/fimmu.2021.652223	34367128	CAR-NK Cells Effectively Target SARS-CoV-2-Spike-Expressing Cell Lines In Vitro	2021	Front Immunol	Ma, Minh Tuyet	Viral	SARS-CoV-2	NK cells	retroviral transduction	spike (S) glycoprotein	scFv	No	-
10.3389/fimmu.2021.763460	35003077	Glycoprotein Targeted CAR-NK Cells for the Treatment of SARS-CoV-2 Infection	2021	Front Immunol	Christodoulou, Ilias	Viral	SARS-CoV-2	NK cells	retroviral transduction	spike (S) glycoprotein	H84T-BanLec	No	-
10.1016/j.isci.2021.103295	34693218	Effective chimeric antigen receptor T cells against SARS-CoV-2	2021	iScience	Guo, Xueyang	Viral	SARS-CoV-2	T cells	lentiviral transduction	RBD region	scFv	No	-
10.3389/fimmu.2021.669103	34367135	CAR Macrophages for SARS-CoV-2 Immunotherapy	2021	Front Immunol	Fu, Wenyan	Viral	SARS-CoV-2	Macrophages	lentiviral transduction	S protein	scFv	No	-
10.1371/journal.ppat.1009831	35130312	CAR/CXCR5-T cell immunotherapy is safe and potentially efficacious in promoting sustained remission of SIV infection,	2022	PLoS Pathogens	Pampusch, Mary S.	Viral	SIV	T cells	Gammaretroviral transduction	gp120	CD4/mannose-binding lectin	No	-
10.1172/jci.insight.161698	36345941	In vivo killing of primary HIV-infected cells by peripheral-injected early memory–enriched anti-HIV duoCAR T cells,	2022	JCI Insight	Anthony-Gonda, Kim	Viral	HIV	T cells	lentiviral transduction	gp120	CD4/mannose-binding lectin	No	-
10.3390/cells11213386	36359781	Modification of Hinge/Transmembrane and Signal Transduction Domains Improves the Expression and Signaling Threshold of GXMR-CAR Specific to Cryptococcus spp.,	2022	Cells	dos Santos, Matheus Henrique	Fungal	Cryptococcus	T cells	lentiviral transduction	glucuronoxylomannan	scFv	No	-
10.1007/s40808-021-01312-3	34667828	Forecasting the action of CAR-T cells against SARS-corona virus-II infection with branching process,	2022	Modeling Earth Systems and Environment	Al-Utaibi, Khaled A.	Viral	SARS-CoV-2	T cells	Modeling	Modeling	Modeling	Modeling	-
10.3389/fimmu.2022.1032537	36582226	Development of an anti-CAR antibody response in SIV-infected rhesus macaques treated with CD4-MBL CAR/CXCR5 T cells,	2022	Frontiers in Immunology	Davey, Brianna C.	Viral	SIV	T cells	Gammaretroviral transduction	gp120	CD4/mannose-binding lectin	No	-
10.1016/j.omtm.2022.04.007	35573050	Pre-clinical data supporting immunotherapy for HIV using CMV-HIV-specific CAR T cells with CMV vaccine,	2022	Molecular Therapy - Methods and Clinical Development	Guan, Min	Viral	HIV	T cells	lentiviral transduction	gp120	scFv	No	-
10.4049/immunohorizons.2200073	36220186	HIV-Specific CAR T Cells with CD28 or 4-1BB Signaling Domains Are Phenotypically and Functionally Distinct and Effective at Suppressing HIV and Simian Immunodeficiency Virus	2022	Immunohorizons	Cartwright, Emily K.	Viral	HIV, SIV	T cells	Gammaretroviral transduction	gp120	CD4/mannose-binding lectin	No	-
10.1172/jci.insight.161698	36345941	In vivo killing of primary HIV-infected cells by peripheral-injected early memory-enriched anti-HIV duoCAR T cells	2022	JCI Insight	Anthony-Gonda, Kim	Viral	HIV	T cells	lentiviral transduction	gp120	CD4/mannose-binding lectin	No	-
10.1002/cti2.1421	36285327	Targeting SARS-CoV-2 infection through CAR-T-like bispecific T cell engagers incorporating ACE2	2022	Clin Transl Immunology	Dogan, Mikail	Viral	SARS-CoV-2	T cells	lentiviral transduction	Spike and CD3	ACE2 and scFv	No	-
10.3389/fimmu.2022.877682	35967430	Efficient derivation of chimeric-antigen receptor-modified TSCM cells	2022	Front Immunol	Kranz, Emiko	Viral	HIV	stem cell-memory T	lentiviral transduction	gp120	CD4	No	-
10.1016/j.ymthe.2021.10.006	34628050	Dual-antigen targeted iPSC-derived chimeric antigen receptor-T cell therapy for refractory lymphoma	2022	Mol Ther	Harada S	Viral	EBV	iPSCs	lentiviral transduction	LMP1	scFv	No	-
10.1126/scitranslmed.abh1209	36170447	CAR T cells targeting Aspergillus fumigatus are effective at treating invasive pulmonary aspergillosis in preclinical models	2022	Sci Transl Med	Seif, Michelle	Fungal	Aspergillus spp	T cells				No	-
10.3390/v15010202	36680242	Development of HIV-Resistant CAR T Cells by CRISPR/Cas-Mediated CAR Integration into the CCR5 Locus	2023	Viruses	Frederik Holm Rothemejer	Viral	HIV	T cells	CRISPR/Cas-Mediated	gp120	scFv	No	-
10.3389/fimmu.2023.1103695	36817460	GMP development and preclinical validation of CAR-T cells targeting a lytic EBV antigen for therapy of EBV-associated malignancies	2023	Front Immunol	Zhang X	Viral	EBV	T cells	lentiviral transduction	gp350	scFv	No	-
